# Supplementary material for: Fostering Creative Writing in EFL Learners: A Mixed-Methods Study of an Iterative E-Learning Model
Source: Research Square preprint supplement (doi:10.21203/rs.3.rs-7367386/v1), 2025-09-29
Supplement: Supplementary file 1 [file 437ca9c555321f01971105fe.xlsx]

## Sheet: ورقة1
Originality	accuracy	Self-Expression	Fluency	Flexibility	post Creative Writing	group	Originality	accuracy	Self-Expression	Fluency	Flexibility	pre exp Creative Writing
10	10	7	8	6	41	1	9	11	7	9	6	42
11	12	12	11	8	54	1	11	12	12	11	5	51
7	7	6	7	4	31	1	7	8	6	7	4	32
13	12	13	13	9	60	1	13	12	12	13	9	59
8	9	9	9	7	42	1	8	9	9	9	6	41
8	6	6	7	5	32	1	8	6	6	8	6	34
11	9	10	12	8	50	1	10	9	9	12	8	48
5	8	5	6	4	28	1	5	9	5	6	5	30
10	9	9	11	7	46	1	10	9	9	11	7	46
13	12	12	13	9	59	1	13	12	12	13	9	59
10	11	11	11	8	51	1	10	11	11	11	8	51
8	9	8	9	6	40	1	8	9	8	8	6	39
12	11	11	12	8	54	1	12	11	11	12	8	54
5	9	6	7	5	32	1	6	9	6	7	5	33
9	10	9	10	7	45	1	9	10	9	10	7	45
11	10	10	12	8	51	1	11	10	10	12	8	51
7	8	7	8	5	35	1	7	9	7	8	6	37
14	13	13	14	10	64	1	14	13	13	11	10	61
12	11	11	12	8	54	1	12	11	11	13	8	55
9	10	8	10	7	44	1	9	10	8	10	7	44
13	12	12	13	9	59	1	13	11	12	13	9	58
10	9	10	10	7	46	1	10	10	9	10	7	46
6	8	6	7	5	32	1	6	9	6	8	6	35
10	11	11	11	8	51	1	10	11	11	11	8	51
14	11	13	14	9	61	1	14	11	11	14	9	59
7	8	7	8	5	35	1	7	9	7	10	6	39
11	11	11	12	8	53	1	11	11	11	12	8	53
11	12	12	11	8	54	1	11	12	12	11	8	54
8	9	8	9	6	40	1	8	9	8	10	7	42
9	10	9	10	7	45	1	9	10	10	10	7	46
18	13	17	18	16	82	2	9	9	9	8	8	43
19	18	19	16	17	89	2	10	12	12	11	7	52
18	17	17	18	17	87	2	7	8	6	7	4	32
19	19	18	19	16	91	2	13	12	12	13	9	59
19	15	18	15	17	84	2	9	9	9	9	7	43
16	15	17	17	18	83	2	8	9	6	8	7	38
19	16	18	17	17	87	2	10	9	9	12	8	48
18	18	16	16	16	84	2	5	8	6	6	7	32
18	16	19	19	18	90	2	10	9	9	11	7	46
18	17	15	14	11	75	2	13	12	12	13	9	59
19	19	18	18	17	91	2	8	11	11	11	8	49
19	14	16	17	14	80	2	8	8	9	9	7	41
16	18	14	15	15	78	2	12	11	11	12	8	54
18	16	18	17	17	86	2	7	9	9	8	5	38
18	15	16	14	13	76	2	9	10	10	11	7	47
18	15	19	18	16	86	2	11	10	10	12	8	51
19	19	18	16	15	87	2	9	8	8	9	6	40
18	14	15	18	11	76	2	14	13	13	11	10	61
19	15	16	15	14	79	2	12	11	11	13	8	55
19	16	19	19	18	91	2	9	9	9	10	7	44
19	16	19	18	16	88	2	13	12	12	13	9	59
18	19	16	18	27	98	2	9	9	9	10	7	44
16	13	17	11	9	66	2	9	8	8	9	6	40
19	18	19	16	15	87	2	10	11	11	11	8	51
19	13	16	17	13	78	2	12	11	11	14	9	57
16	16	14	15	11	72	2	7	8	8	10	6	39
19	15	19	19	18	90	2	11	11	11	12	8	53
19	18	18	16	14	85	2	11	12	12	11	8	54
18	16	16	18	17	85	2	8	9	9	10	7	43
18	15	15	14	15	77	2	10	10	10	10	7	47
