# Supplementary material for: Fostering Creative Writing in EFL Learners: A Mixed-Methods Study of an Iterative E-Learning Model
Source: Research Square preprint supplement (doi:10.21203/rs.3.rs-7367386/v1), 2025-09-29
Supplement: Supplementary file 2 [file a016cda72cfc41a58df5f7d9.xlsx]

## Sheet: Sheet1
Word	Length	Count	Weighted Percentage (%)	Similar Words
content	7	685	2.16	address, advice, answer, application, approach, challenge, collection, comment, commitment, conceptualization, conclusion, confidence, content, core, criticism, culture, description, design, difference, discipline, end, engagement, error, example, experience, explanation, expression, eyes, feedback, feeling, fiction, formatting, fun, gen, goal, guidance, idea, input, inspiration, intent, judgment…
act	3	758	2.1	accomplishment, act, address, answer, application, approach, articulation, assessment, assignment, attention, best, brainstorming, break, breakthrough, challenge, change, character, choice, collaboration, collection, comfort, commitment, conclusion, control, corrections, course, craft, custom, date, description, detail, development, difference, discipline, discussion, draft, ease, effort, elabora…
communal	8	650	1.88	act, address, advice, answer, application, articulation, break, brief, challenge, change, check, code, collection, comment, commitment, common, communal, content, conversation, core, criticism, description, detail, develop, direct, discipline, discuss, discussion, elaboration, esp, exact, explanation, expression, fear, final, flash, fluency, form, formatting, fun, gen, genre, get, give, giving, g…
reflections	11	144	1.79	act, comment, expressing, expression, input, mirrored, point, reflecting, reflection, reflections, reflective, reflectively, think, thought, thoughtful, thoughtfully
comments	8	99	1.27	comment, commenters, comments, input, mention, reflection, report, reviewing, statement, talk
statement	9	356	1.26	answer, blind, brief, check, clarification, code, comment, conclusion, content, description, error, explanation, expression, feedback, fiction, idea, input, instructions, link, mention, outline, overview, reading, reflection, reply, response, statement, statements, story, submission, summary, theme, thing, understanding, version, word
change	6	524	1.24	access, address, approach, articulation, back, better, blind, block, blunt, break, change, changes, check, clarification, clean, clear, code, comfort, complete, completion, conclusion, concrete, consolidate, consolidation, content, core, culmination, culture, curve, deepened, develop, development, difference, dynamic, ease, elaboration, end, ending, evolve, exchange, experience, feel, felt, file,…
actionable	10	344	1.22	accomplishment, act, actionable, application, approach, assignment, attention, break, change, choice, conclusion, course, effort, ending, engagement, exchange, feedback, flow, freeing, hit, improvement, interaction, investment, opening, option, origin, playing, plot, progress, reaction, relief, rush, satisfaction, selection, smooth, stand, start, synthesis, taking, thing, way, willing, work
challenge	9	147	1.21	ambitious, challenge, challenges, challenging, difficult, favourite, hard, stimulating
response	8	241	1.1	accountability, answer, answered, feedback, job, quality, reaction, replies, reply, requirement, response, start, statement, style, way
helpful	7	141	1.01	aiding, better, comfort, draft, encourage, facilitated, helped, helpful, improve, look, page, piece, reinforcement, relief, see, supported, supportive, work
useful	6	205	1.01	act, address, application, board, custom, development, enjoyable, enjoyed, exercises, functional, give, habits, influence, practical, practice, practicing, purpose, put, quality, role, take, task, technology, use, used, useful, using, work
process	7	377	0.95	actionable, assessment, attention, awareness, choice, collection, control, culture, developing, development, explanation, eye, feeling, file, fixing, imagery, impact, insight, inspiration, integration, judgment, knowing, learning, manage, option, origin, polished, procedure, process, processing, progress, reaction, reading, reasoning, refined, refinement, refining, response, seeing, selection, st…
writing	7	355	0.88	access, act, address, assignment, brief, check, code, conclusion, criticism, critique, development, dialogue, draft, drafting, end, ending, fiction, form, job, judgment, key, natural, opening, outline, paper, place, platform, poem, point, put, report, revise, revising, revision, script, selection, statement, story, style, text, theme, tone, type, version, well, word, words, work, write, writing, …
quality	7	280	0.81	accessibility, accuracy, approach, aspect, awkwardness, bad, better, change, character, check, clarity, coherence, competence, complexity, control, correctness, difference, difficulty, doubt, ease, elaboration, error, expression, finish, finishing, flexibility, focus, form, good, importance, influence, interest, level, look, making, mar, organization, originality, perspective, phase, point, prefe…
feb	3	40	0.78	feb
work	4	273	0.77	act, answer, application, assignment, attention, break, central, chore, collection, compilation, complex, difficulty, effort, engagement, exchange, exercises, experiment, fix, form, functional, get, handling, job, learning, making, manage, output, page, part, picking, place, playing, polishing, portfolio, practical, procedure, product, project, represent, research, risk, role, series, shaped, str…
revision	8	103	0.74	revise, revised, revising, revision, revisions, rewriting', writing
functional	10	129	0.74	answer, formal, functional, opening, part, parts, perform, place, portfolio, practical, procedure, reflection, role, structural, useful, working
sites	5	54	0.71	computer, place, rough, site, sites
structure	9	155	0.7	back, block, building, classroom, complex, constructive, constructively, design, form, functional, hurdle, integrate, integrated, integrating, integration, keep, layout, level, opening, organization, outlet, platform, screen, story, structural, structure, structured, structuring, syntax, theory, zone
liked	5	70	0.66	careful, carefully, carefulness, feeling, form, like, liked, potential, potentially, preference, reflection, see, view, wished
ideas	5	200	0.62	amount, character, complex, conceptualization, constant, content, control, design, end, error, example, feature, feeling, figuring, form, idea, ideas, inspiration, intent, outline, part, product, project, purpose, quality, reaction, right, sophistication, standard, statement, strategy, suggestion, teacher, theme, themes, theory, thing, thought, thoughtful, thoughtfully, value, variable, view, way…
pieces	6	91	0.61	end, example, feature, fix, flash, intro, paper, part, parts, personal, picked, picking, piece, pieces, share, time
constructive	12	175	0.59	access, amount, aspect, building, character, complex, concepts, conceptualization, conclusion, constant, constructive, constructively, creative, description, due, end, expressing, expression, external, feature, form, genre, given, idea, like, making, multiple, one, part, point, positive, product, quality, response, right, structural, style, teacher, theory, thing, thinking, thought, type, value, …
analysed	8	55	0.57	analysed, check, google, research, screen, view
disliked	8	33	0.55	disliked, dislikes, feeling
informant	9	229	0.55	break, brief, change, check, checklist, clear, comment, common, confidence, content, detail, develop, direct, example, fear, formatting, gen, general, informant, informed, input, instructions, intro, key, knowing, point, portfolio, presentation, reading, reinforcement, reiterate, report, represent, sound, specific, story, summarise, summarization, summarize, talk, tell, track, word
receiving	9	66	0.54	change, due, experience, experiment, experimenting, experiments, finding, get, getting, meeting, received, receiving, recognize, see, standard, standards, take, view
motivation	10	75	0.54	act, design, driven, dynamic, idea, motivated, motivating, motivation, motivator, need, needed, prompted, prompts, theme
required	8	47	0.53	demanding, essential, expectations, expected, involved, necessary, need, needed, required, requirement, requirements, take, taking, tell, wanted
gdocs	5	26	0.51	gdocs
whole	5	196	0.5	access, approach, balance, basic, blank, block, board, building, complex, course, design, entire, extra, felt, form, future, good, implement, level, medium, one, opening, outlet, overlapping, piece, platform, product, range, screen, solid, step, story, structure, surface, test, thing, track, type, way, well, whole, working
mahara	6	25	0.49	mahara
good	4	157	0.49	basic, beneficial, better, change, complete, effective, effectively, feature, future, generic, genuine, good, great, honest, interest, just, nice, pleasing, practical, practice, practicing, product, quality, right, satisfactory, serious, skill, skills, solid, sound, thorough, thoroughly, well
focused	7	67	0.47	centered, clarity, direct, directly, emphasis, focus, focused, focusing, point, stress, stressful, think
maybe	5	25	0.46	maybe, perhaps, possibilities, possibly
positive	8	171	0.46	address, amount, attention, back, balance, confidence, confident, confirmed, constructive, develop, direct, emphasis, end, first, fix, fixing, formal, importance, job, level, pair, part, perspective, perspectives, place, point, positive, presentation, put, quality, range, reader, right, role, short, site, space, spots, stance, stand, stated, step, structure, submitting, take, target, terms, view
exploring	9	45	0.45	exploring, google, research
examples	8	54	0.44	example, examples, exercises, instances, piece, represent, template, time
improved	8	122	0.44	better, change, clarification, clean, comfort, develop, developed, development, ease, elaboration, fix, fixing, improve, improved, improvement, improvements, improving, perfect, perform, piece, point, progress, refinement, reinforced, smooth
management	10	163	0.43	accomplishment, achieved, achievements, achieving, act, block, careful, carefully, carefulness, control, direct, directly, flexibility, guidance, handling, manage, manageable, management, managing, organization, process, revise, work
design	6	137	0.43	address, assigned, assignment, assignments, break, check, colors, concepts, conclusion, creativity, design, direct, draft, end, exchange, figuring, finding, goal, idea, intent, intentionally, layout, loop, miss, organization, page, patterns, pinpoint, place, plot, point, pointed, points, project, purpose, showed, showing, standard, style, task, think, view
clear	5	148	0.42	change, clarification, clarity, clean, clear, clearly, focus, freeing, gains, improved, improvement, making, okay, open, opened, opening, perfect, quality, take, transparent, understand, understandable, understanding, vivid
points	6	136	0.42	address, back, conclusion, core, culmination, date, deadline, deep, direct, directly, end, ending, finish, first, fix, focus, guided, high, level, meeting, oriented, origin, outlet, phase, pinpoint, place, point, pointed, points, punctuation, right, site, spots, stage, stages, stand, start, take, target, targeted, tell, time, zone
sometimes	9	21	0.41	sometimes
time	4	87	0.41	approach, example, experience, flash, influence, multiple, none, piece, sentence, sentences, time
stated	6	129	0.4	answer, anxiety, articulate, comfort, comment, complex, control, enthusiasm, fear, feeling, feelings, fluency, form, formal, formally, give, mastery, mention, phase, preference, pride, reply, represent, saying, sentence, solid, sophistication, stated, submission, take, technique, tell, thing
style	5	149	0.38	address, emphasis, expression, fluency, form, genre, poetry, process, prose, response, setup, speech, stress, style, styles, tone, tool, way, write
skill	5	85	0.38	accomplishment, complete, control, craft, fluency, good, mastery, nice, precise, skill, skills, sophistication, technical, technique
direct	6	140	0.38	address, block, blunt, content, control, course, direct, directly, exact, give, guidance, guided, instructions, level, manage, manageable, organization, oriented, perform, place, point, pointed, project, quality, straightforward, style, take, taking, target, tell, training, way, work
implement	9	107	0.37	act, complete, core, file, finish, give, helpful, implement, implemented, key, practice, saw, step, style, tool, track, voice, way
learning	8	120	0.37	check, develop, instructions, knowing, learned, learning, mastering, practice, reading, see, seeing, take, taking, talk, test, work
professional	12	35	0.36	change, instructor, key, mastering, professional, reader, teacher
different	9	93	0.36	balance, change, conflicting, difference, differences, different, diverse, opposite, quality, words
words	5	94	0.35	articulate, articulated, articulating, articulation, dialogue, difference, discuss, discussed, discussion, discussions, expression, form, interview, opposite, put, session, speech, statement, text, theme, verb, word, words
feel	4	135	0.35	anxiety, awareness, comfort, complex, confidence, enthusiasm, experience, experiment, experimenting, experiments, fear, feel, feeling, feelings, finding, idea, insight, look, preference, pride, relief, satisfaction, see, sense, submission, thing, think, thought, tone
expressing	10	130	0.35	answer, articulate, articulation, aspect, aspects, comment, expressing, expression, get, give, highlight, look, mention, put, quality, reply, represent, saw, saying, sentence, showed, showing, sound, speech, stated, step, stress, style, tell, time, verbal, voice, word
general	7	39	0.35	common, general, generally, generic, idea, mostly, overall, quality, talk, thought
pushed	6	42	0.34	ambitious, approach, forced, pressure, progress, pushed, pushing, struggle
development	11	111	0.34	better, break, change, culture, develop, developed, developing, development, elaboration, evolution, evolve, evolving, get, getting, growth, improve, improved, improvement, processing, progress, training, use
organization	12	92	0.34	design, detail, essential, eye, form, formatting, incorporated, integrated, layout, manage, methodical, opening, organization, revise, start, structure, structured, tool
sharing	7	88	0.34	common, effort, end, giving, interest, part, parts, piece, right, share, shared, sharing, try, way
metacognition	13	17	0.33	metacognition, metacognitive, metacognitively
facilitated	11	50	0.33	ease, facilitated, helpful
linked	6	76	0.32	articulate, articulation, code, coherence, connected, fix, fixing, identify, input, link, linked, loop, mention, pair, piece, point, related, remember, statement, think
connected	9	48	0.32	articulation, connected, continued, hit, link, linked, meeting, online, point, related, series, short
fri	3	16	0.31	fri, minor
powerful	8	142	0.31	accomplishment, attention, control, craft, creativity, depth, design, influence, interest, judgment, originality, powerful, pressure, quality, range, sense, skill, speech, strength, strong, technique, understanding
giving	6	89	0.31	answer, back, big, board, break, change, commitment, date, generation, give, giving, lot, making, open, opened, opening, perform, presentation, presented, presenting, range, sharing, tell, think, use
evaluation	10	147	0.3	assessment, challenge, clear, critical, critique, develop, doubt, evaluation, feel, identify, judgment, like, place, project, range, reader, recognize, reconcile, see, slight, stand, think, understand, value, view
seeing	6	97	0.3	check, considering, control, date, ensuring, experience, experiment, experimenting, experiments, fear, feel, figuring, finding, identify, images, interpreting, like, look, meeting, project, see, seeing, sense, take, think, understand, understandable, understanding, value, view, visually, visuals
stories	7	85	0.3	accountability, content, fiction, flash, history, level, narratives, plot, report, stories, story, structure
way	3	125	0.3	access, approach, choice, course, journey, opening, part, selection, share, steps, structure, tool, track, voice, way
paper	5	190	0.29	act, application, assignment, brief, documented, documents, form, judgment, medium, paper, platform, process, product, report, statement, submission, theme, themes, well, writing
specific	8	46	0.29	description, particularly, proper, specific, specifically, specifics
things	6	164	0.29	articulation, back, behind, change, content, feature, feeling, least, process, statement, structure, target, thing, things
mentioned	9	40	0.29	acknowledged, comment, input, mention, mentioned, noted, notes, remember, tell
incorporated	12	81	0.28	consolidation, incorporated, integrate, integrated, integrating, integration, learning, quality
making	6	204	0.28	act, amount, change, clear, craft, design, develop, direct, draft, evolve, fix, form, found, get, give, hit, influence, interest, keep, look, making, outline, output, overcome, perform, phase, piece, place, plot, project, put, represent, rough, rush, script, see, short, stage, start, style, take, taking, think, time, track, view, work, write
creative	8	52	0.28	constructive, creative, creativity, design, origin, originality
influence	9	152	0.28	fix, form, impact, influence, pressure, shaped, suggestion, time, use, work, worked, working
hard	4	76	0.27	ambitious, awkward, bad, challenging, difficult, difficulty, hard, harsh, heavily, heavy, problematic, quality, rough, serious, solid, strong, tricky, trying
look	4	55	0.27	check, confront, expectations, expected, eye, feel, look, peer, see, seemed, seems, sound, superficial, view
others	6	46	0.27	another, difference, different, new, opposite, others
thinking	8	194	0.26	change, considering, critique, design, direct, fear, feel, focus, give, identify, integrate, like, link, mention, place, plot, process, project, purpose, range, reasoned, reasoning, recognize, reconcile, remember, see, stand, take, think, thinking, time, type, value, view
tool	4	127	0.26	file, implement, process, saw, style, tool, tools, way, work
pleasing	8	70	0.26	easy, encouraged, good, like, pleasing, proud
tried	5	73	0.26	act, best, control, difficult, effort, efforts, end, essays, hard, part, risk, share, stress, stressful, struggle, take, test, tried, try, trying
effective	9	91	0.25	accomplishment, act, change, competent, core, effective, effectively, efficient, feeling, forced, get, impact, influence, issues, product, reaction, response, rush, strength, strengths
suggestion	10	80	0.25	approach, idea, influence, prompted, prompts, suggestion, suggestions, thought
syntax	6	34	0.25	grammar, structure, syntax
drafting	8	74	0.25	check, craft, depth, design, draft, drafting, drafts, outline, outlined, pulling, text, write, writing
better	6	89	0.25	best, better, break, good, improved, improvement, major
originality	11	75	0.25	break, develop, developed, developing, development, earlier, example, first, found, initial, initially, mastering, new, origin, originality, point, quality, start
distracted	10	54	0.24	distracted, distracting, revision
peer	4	38	0.24	look, peer, peers, peers', relief
demanding	9	97	0.24	challenge, demanding, exact, lack, need, needed, pressure, use
significant	11	63	0.24	content, core, importance, intent, meaningful, nuance, point, refinement, sense, significant, significantly, substantial
mon	3	12	0.24	mon
