# Supplementary material for: Fostering Creative Writing in EFL Learners: A Mixed-Methods Study of an Iterative E-Learning Model
Source: Research Square preprint supplement (doi:10.21203/rs.3.rs-7367386/v1), 2025-09-29
Supplement: Supplementary file 3 [file bb88df12ff5955797914bb8c.docx]

**Instrument A: Creative Writing Skills Checklist**

**Purpose:** To identify and assess the development of key creative writing skills in student work using a standardized 5-point rating scale. Intended for instructor formative/summative assessment, or adaptable for peer/self-assessment with training.

**Student Name:** _________________________ **Assignment:** _________________________ **Date:** _________
**Rater:** _________________________

**Instructions:** For each skill dimension below, provide brief notes or examples of evidence observed in the student's work in the designated column. Then, indicate the student's proficiency level by circling or checking the corresponding number in the rating columns (1 to 5), using the scale defined below.

| **Skill Dimension** | **Description** | **Evidence Observed (Brief Notes/Examples)** | **Rating (Circle or Check One Number)** | | | | |
| --- | --- | --- | --- | --- | --- | --- | --- |
|  |  |  | **1** | **2** | **3** | **4** | **5** | |
| **1. Originality** | Presents unique ideas, perspectives, or approaches; avoids clichés; uses fresh imagery or language. |  |  |  |  |  |  | |
| **2. Accuracy** | Demonstrates appropriate control of grammar, syntax, vocabulary, spelling, and punctuation for clear expression. |  |  |  |  |  |  | |
| **3. Self-Expression** | Conveys a distinct personal voice, tone, feelings, or viewpoint; writing feels authentic and engaged. |  |  |  |  |  |  | |
| **4. Fluency** | Writing flows smoothly; ideas connect logically; sentence structure varies; generates sufficient text with ease. |  |  |  |  |  |  | |
| **5. Flexibility** | Shows ability to generate diverse ideas, use varied vocabulary and sentence structures, or shift perspectives. |  |  |  |  |  |  | |
| **Overall Impact** | The piece is engaging, coherent, and effectively achieves its creative purpose. |  |  |  |  |  |  | |

**Rating Scale Key:**

- **1 = Very Weak / Beginning:** Skill is largely absent or demonstrated very poorly; significant flaws.
- **2 = Weak / Developing:** Skill is present but inconsistent or underdeveloped; noticeable weaknesses require significant improvement.
- **3 = Moderate / Competent:** Skill is demonstrated adequately; meets basic expectations for the level, but lacks consistent strength or sophistication.
- **4 = Strong / Proficient:** Skill is demonstrated effectively and consistently; shows good understanding and application; minor refinement may be needed.
- **5 = Very Strong / Excellent:** Skill is demonstrated consistently at a high level; exceeds expectations; shows sophisticated understanding and application.

**Overall Comments:**

__________________________________________________________________________________________________________________________________________________________________________________________________________________________________________

**Instrument B**

**Pre-post Creative Writing Skills Test**

**(I) Test Prompt Example:**

**Instructions:** You have 45 minutes to respond creatively to the following prompt. You can write a short story, a poem, a descriptive piece, or another creative form. Aim for approximately 200-300 words. Focus on expressing your ideas clearly and imaginatively.

**Prompt:** *Imagine a world where people could store their memories in physical objects (like stones, shells, or buttons). Touching the object allows someone else to experience the stored memory. Write a creative piece exploring an idea related to this concept.*

**(II) Analytic Rubric Outline: (Each dimension is marked out of 20)**

| Criteria | **4 - Excellent / Highly Proficient** | **3 - Good / Proficient** | **2 - Fair / Developing** | **1 - Needs Improvement / Beginning** | **Score** |
| --- | --- | --- | --- | --- | --- |
| **Originality** | Concept/perspective is highly unique and insightful; fresh language/imagery; avoids clichés completely. | Concept is creative and engaging; mostly avoids clichés; some fresh language. | Concept is somewhat conventional but may have moments of originality; relies partly on familiar ideas. | Concept is highly predictable or derivative; relies heavily on clichés; lacks unique perspective. |  |
| **Accuracy** | Errors in grammar, vocabulary, mechanics are rare and minor; language is precise and effective. | Minor errors present but do not impede understanding; language is generally clear. | Errors occur more frequently and occasionally impede understanding; language sometimes unclear or awkward. | Frequent errors significantly impede understanding; language is often unclear or inaccurate. |  |
| **Self-Expression** | Distinctive, authentic voice/tone; conveys feeling/perspective convincingly; strong writer engagement. | Clear voice/tone; conveys feeling/perspective effectively; writer seems engaged. | Voice/tone is somewhat inconsistent or generic; feeling/perspective is present but not fully developed. | Voice/tone is flat or absent; little sense of personal feeling or perspective; lacks engagement. |  |
| **Fluency** | Writing flows effortlessly; varied, well-constructed sentences; ideas connect seamlessly; ample output. | Writing flows well most of the time; good sentence variety; logical connections; adequate output. | Writing is sometimes choppy or hesitant; sentence structure may be repetitive; connections sometimes weak. | Writing is difficult to follow; sentences often basic or flawed; ideas disconnected; limited output. |  |
| **Flexibility** | Explores multiple facets of the idea; uses a wide range of appropriate vocabulary and sentence structures. | Demonstrates variety in ideas, vocabulary, and sentence structure. | Limited variety in ideas or language; tends towards repetitive structures or vocabulary. | Very little variety in ideas, vocabulary, or sentence structure; rigid approach. |  |
| **Overall** | Highly engaging, skillfully crafted, sophisticated; achieves creative purpose exceptionally well. | Engaging and well-organized; demonstrates good craft; effectively achieves creative purpose. | Moderately engaging; shows developing craft but has weaknesses; partially achieves creative purpose. | Lacks engagement; poorly organized/crafted; does not achieve creative purpose effectively. |  |
|  |  |  |  |  | **Total: 100** |

**Instrument C**

**Semi-structured Interview Protocol**

**Study:** Enhancing EFL Creative Writing via Collaborative Docs & E-Portfolios
**Interviewer:** _________________________ **Interviewee (Code):** ___________ **Date:** _________

**(1) Introduction (Approx. 2-3 mins)**

- Greeting, thank participant for their time.
- Reiterate the purpose of the interview: To understand their experiences using the online tools (collaborative documents, e-portfolio) and the process during the creative writing module.
- Confirm confidentiality and anonymity: Explain data handling, use of pseudonyms.
- Mention approximate duration (e.g., 20-30 minutes).
- Ask for permission to audio-record the interview.
- Ask if they have any initial questions.

**(2) General Experience (Approx. 3-5 mins)**

- "To start, could you tell me generally how you felt about the creative writing part of the course this term?"
- "What did you enjoy most or least about it?"

**(3) Iterative Process (Drafting, Feedback, Revision) (Approx. 5-7 mins)**

- "The module involved several cycles of drafting, getting feedback, and revising your work. Can you describe your experience with this process?"
- "How helpful or unhelpful did you find this cycle of drafting and revising based on feedback?" (Probe: Why? Any specific examples?)
- "Did this iterative process feel different from how you usually write or have been taught to write?" (Probe: How so?)

**(4) Collaborative Documents (e.g., Google Docs) (Approx. 5-7 mins)**

- "We used [mention specific platform, e.g., Google Docs] for drafting and feedback. What was your experience using this tool for your creative writing?"
- "What did you find most useful about using [platform] for drafting?"
- "How did you find the process of giving and receiving feedback using the comment features?" (Probe: Was the feedback helpful? Easy to understand? Easy to give?)
- "Did working in this shared document influence how you wrote or revised?" (Probe: How? Examples?)
- "Were there any challenges in using [platform] for this purpose?"

**(5) E-Portfolios (Approx. 5-7 mins)**

- "You also created an e-portfolio to showcase your final pieces and write reflections. Can you tell me about that experience?"
- "How did you feel about selecting pieces to put into your portfolio?"
- "What did you think about writing the reflections on your writing process?" (Probe: Was it useful? Difficult?)
- "Did having the e-portfolio as a final goal affect your motivation or how you approached the writing tasks?" (Probe: How?)

**(6) Skill Development (Approx. 3-5 mins)**

- "Thinking about specific creative writing skills like originality, accuracy, expressing yourself, fluency, or flexibility – do you feel you improved in any of these areas during the module?" (Probe: Which ones? How did the online tools or the process help, if at all?)
- "Did using the collaborative documents or e-portfolio specifically help you develop any particular skills?"

**(7) Challenges and Suggestions (Approx. 2-3 mins)**

- "Overall, were there any major difficulties you faced with this way of learning creative writing?"
- "Do you have any suggestions for how this approach (using these tools and the iterative process) could be improved?"

**(8) Closing (Approx. 1-2 mins)**

- "Is there anything else you'd like to share about your experience?"
- Thank the participant again for their time and valuable insights.
- Briefly mention next steps if appropriate (e.g., data analysis).

**Instrument D**

**E-portfolio Platform Component Description**

The e-portfolio component utilized Google Sites, Mahara, and Google Classroom. Students in the experimental group were required to create a personal e-portfolio to serve as a curated collection of their finalized creative writing pieces produced during the intervention period. For each included piece, students were guided to write a structured **reflective entry**.

These reflections prompted students to discuss: (a) their writing process for that specific piece (e.g., idea generation, drafting challenges), (b) how they incorporated peer and instructor feedback received via the collaborative documents, (c) specific aspects of the piece they were proud of or still found challenging, and (d) their perceived learning or skill development related to the assignment and the target creative writing dimensions. The e-portfolio served dual purposes: as a summative showcase of the student's best work resulting from the iterative development process, and as a critical space for fostering metacognitive reflection on their learning journey, providing rich qualitative data on their experience. Assessment considered both the quality of the creative pieces and the depth and insightfulness of the reflections.
